# Supplementary material for: Direct observation of ligand-induced receptor dimerization with a bioresponsive hydrogel
Source: Royal Society of Chemistry journal article supplement (doi:10.1039/c4ra13251c), 2014-01-01
Supplement: c4ra13251c1.pdf [file c4ra13251c1.pdf]

## Supplementary Information

### Direct Observation of Ligand-Induced Receptor Dimerization with a Bioresponsive Hydrogel

Jongseong Kim<sup>a\*</sup>, Yongdo Park<sup>b</sup>, Ashley C. Brown<sup>c</sup>, L. Andrew Lyon<sup>d</sup>

<sup>a</sup> *Department of Chemistry, Eberly College of Science, Pennsylvania State University, University Park, Pennsylvania, 16802*

<sup>b</sup> *Department of Biomedical Engineering, College of Medicine, Korea University, Seoul, Korea, 136-705*

<sup>c</sup> *School of Chemistry and Biochemistry and the Petit Institute for Bioengineering and Bioscience, Georgia Institute of Technology, Atlanta, Georgia, 30332-0400*

<sup>d</sup> *Schmid College of Science and Technology, Chemistry, Chapman University, Orange, California, 92866*

\*To whom correspondence should be addressed: [jxk90@psu.edu](mailto:jxk90@psu.edu)

#### Materials

All reagents were purchased from Sigma-Aldrich unless otherwise specified. *N*-Isopropylacrylamide (NIPAm) was re-crystallized using hexanes (J.T. Baker) prior to use. Acrylic acid (AAc) was distilled under reduced pressure. *N,N'*-Methylene(bisacrylamide) (BIS) and ammonium persulfate (APS) were used as received. 3-Aminopropyltrimethoxysilane (APTMS) was used for the functionalization of cover glasses. The gold seal cover glasses (24×40, No 1.5, Electron Microscopy Sciences) were used as a substrate for hydrogel assembly. Absolute (200 proof) ethanol was used for various purposes in this study. 1-ethyl-3-(3-dimethylaminopropyl) carbodiimide (EDC) and coupling buffer (50 mM 2-[*N*-morpholino]ethanesulfonic acid pH 5.2, 0.05% ProClin 300) were purchased from Bangs Labs. Phosphate buffered saline (PBS) (pH 7.4) and Tris-HCl (pH 7.5) were purchased from Invitrogen. Active-site blocked human  $\alpha$ -thrombin (HCT-BFPRCK) was purchased from Haematologic Technologies Inc. Monoclonal Anti-His antibody was purchased from GE Healthcare, and mAb 6D1 for GPIIb $\alpha$  was a gift from Dr. B. Coller (Rockefeller U., New York, NY).

#### Materials and Methods

**Hydrogel Synthesis.** Hydrogel particles with a molar composition of 89.4% NIPAm, 0.5% BIS, 10% AAc, and 0.1% 4-acrylamido-fluorescein were synthesized *via* aqueous free-radical precipitation polymerization, using 300 mM of total monomer concentration. In a 200 mL

round-bottom flask with three-necks, 100 mL of a filtered aqueous solution of NIPAm and BIS was added and the mixture was heated to  $\sim 70$  °C under a  $N_2$  atmosphere while stirring with a magnetic stir bar. After 1 hr, AAc and 4-acrylamidofluorescein solutions were added to the flask to bring the total monomer concentration up to 300 mM. Polymerization was immediately initiated by injecting 1 mL of a hot ( $\sim 70$  °C) APS solution (6.13 mM) and remained for 4 hours at 70 °C under a  $N_2$  environment. The hydrogels were purified by dialysis against water for  $\sim 2$  weeks with the water being changed twice per day, using 10 000 MW cut-off dialysis tubing (VWR).

**Protein Expression.** The cDNA of human platelet GPIIb $\alpha$  (His<sup>1</sup> to Arg<sup>290</sup>) and vWF A1 domain (Asp<sup>1261</sup> to Pro<sup>1466</sup>) were cloned into Xho I and Mlu I sites of ExpressTag-6 (ET6) vector, a modified version of the pIRES2-GFP vector (Clontech, Inc.), which encodes a Kozak sequence, a N-terminal secretion signal sequence, and a C-terminal His<sub>6</sub> tag. HEK293T cells were transiently transfected using calcium phosphate or Lipofectamine. Culture supernatants were harvested 3 days after transfection and proteins were purified using Ni-NTA affinity chromatography followed by size-exclusion chromatography in 20 mM Tris, pH 7.5, 150 mM NaCl, 0.1 mM BME, and 0.2 mM EDTA.

**Bioresponsive Microgel Preparation.** The anionic hydrogel was functionalized with the human GPIIb $\alpha$  or  $\alpha$ -thrombin by 1-ethyl-3-(3-dimethylaminopropyl) carbodiimide (EDC) coupling reactions. Since the reaction efficiency of the coupling is  $<100$  %, some portion of AAc groups are expected to remain available for binding to the cationic glass substrate. First, the anionic hydrogel (100  $\mu$ L) was centrifuged at 15,871g, and the pellet was resuspended in 200  $\mu$ L of the coupling buffer (MES pH 5.2). EDC (40 mg in 200  $\mu$ L) was added, followed by 20  $\mu$ g of 0.2 mg/mL GPIIb $\alpha$  or 40  $\mu$ g of 3.3 mg/mL  $\alpha$ -thrombin. After shaking for 1 hour at room temperature, the hydrogels were washed 5 times using centrifugation followed by resuspension in phosphate buffered saline (PBS) (pH 7.4).

**Microgel Substrate Preparation for the Dimerization Assay.** Glass cover slips were cleaned in plasma cleaner for 20 min to remove organic residuals from the glass surface. The glass substrates were immersed in an ethanolic (absolute ethanol) 1% APTMS solution for  $\sim 2$  hours, after which they were removed from the APTMS solution and rinsed several times with ethanol (200 proof). These substrates were stored in ethanol for no longer than 3 days prior to use. The substrates were rinsed with DI water and dried by a stream of Ar gas prior to assembly.

The substrate was then assembled with 50-well silicone gasket, and the each well was exposed to 4  $\mu\text{L}$  of an aqueous 5% (v/v dilution of initial concentration following synthesis) bio-microgel solution buffered by PBS buffer (pH 7.4). After 30 min, the substrate was rinsed with PBS buffer, and gently dried with Ar gas. A bionanogel array/gasket assembly was prepared and 6  $\mu\text{L}$  buffered solution of the GPIIb $\alpha$ ,  $\alpha$ -thrombin, BSA, and NaCl was introduced into the void space, followed by covering the assembly with a cover glass. After 1 hour of incubation, microscopic investigations of bionanogel response to ligand-induced dimerization were conducted.

**Microscopy.** Brightfield transmission, differential interference contrast (DIC), and epifluorescence optical microscopies were used to study the changes in the optical properties of the microgel particle attached to the substrate. A Carl Zeiss Axiovert 200M inverted microscope equipped with a high numerical aperture, oil immersion 100X objective (NA=1.30) was used for all microscopies reported here. Images were captured using CCD camera (AxioCamMR, Zeiss).

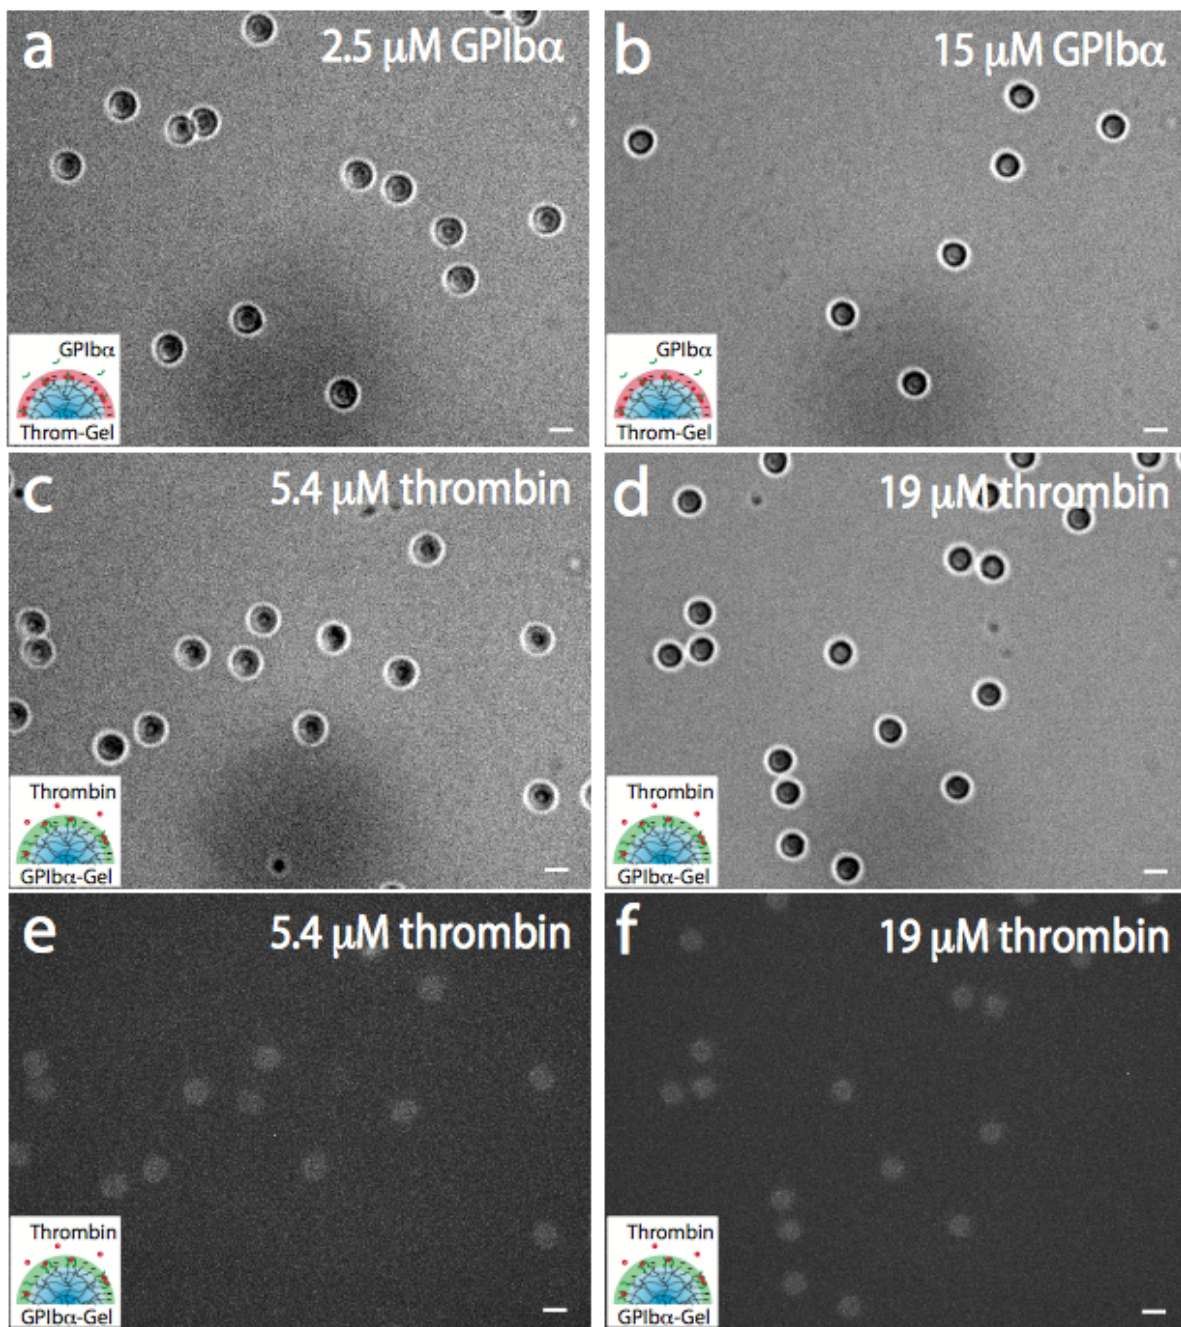

**SI Figure 1.** Wider view image of thrombin- (a,b) or GPIb $\alpha$ - (c-f) functionalized microgel particles in response to the indicated concentration of GPIb $\alpha$  or thrombin, respectively. Fluorescence microscopy images of the microgels of c and d are shown in e and f, respectively. Note that 6  $\mu\text{l}$  of each 1X PBS buffered solution was used for the experiment. The scale bars are 2  $\mu\text{m}$ .

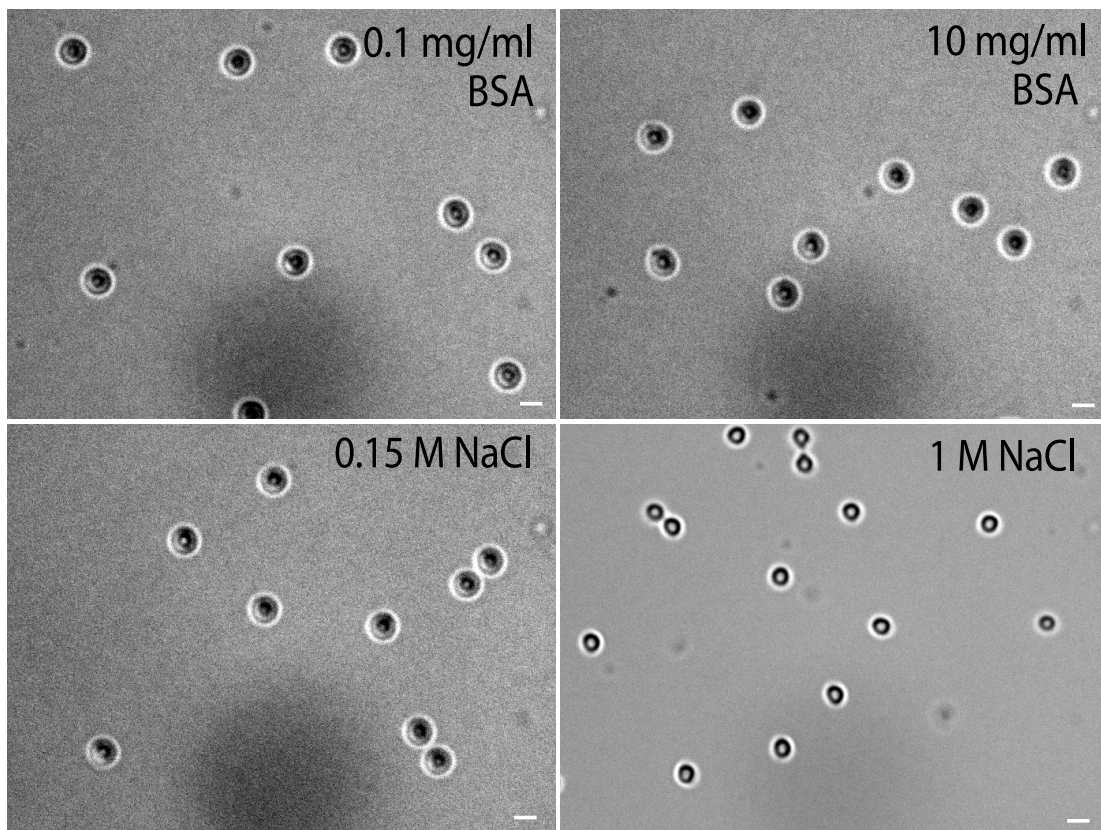

**SI Figure 2.** Wider view image of GPIb $\alpha$ -functionalized microgel particles in response to the indicated concentrations of BSA in 1X PBS buffer (pH 7.4, top row) or NaCl in 50 mM Tris-HCl buffer (pH 7.5, bottom row). Note that 6  $\mu$ l of each solution was used for the experiment. The scale bars are 2  $\mu$ m.

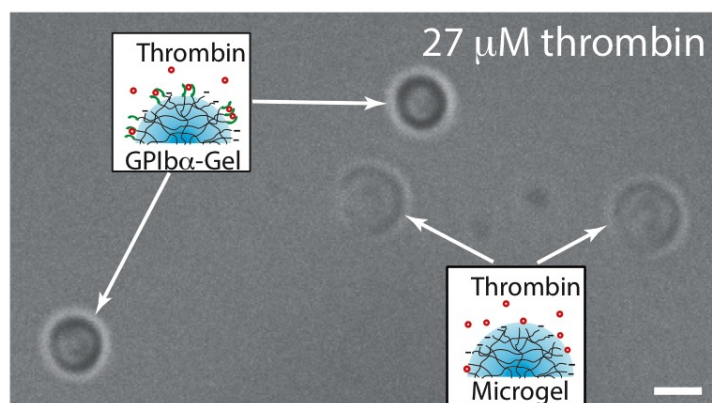

**SI Figure 3.** Wider view image of GPIIb/IIIa-functionalized and non-functionalized microgel particles in response to the indicated concentrations of thrombin in 1X PBS buffer. Note that 6  $\mu\text{l}$  of each solution was used for the experiment. The scale bars are 2  $\mu\text{m}$ .
